# Supplementary material for: Effects of Bacillus pumilus BP-171 and Carbon Sources on the Growth Performance of Shrimp, Water Quality and Bacterial Community in Penaeus vannamei Culture System
Source: MDPI journal article supplement (doi:10.3390/w14244037), 2022-12-10
Supplement: s1 [file s1]

**Table S1.** Composition of the basic feed

| Ingredient    | Content/% | Ingredient       | Content/% |
|---------------|-----------|------------------|-----------|
| Crude protein | ≥42.0     | Moisture         | ≤12.0     |
| Lys           | ≥1.80     | Salt             | 0.50-3.00 |
| Crude fibre   | ≤6.0      | Ca               | 1.00-4.00 |
| Ash           | ≤16.0     | Total phosphorus | ≥1.00     |

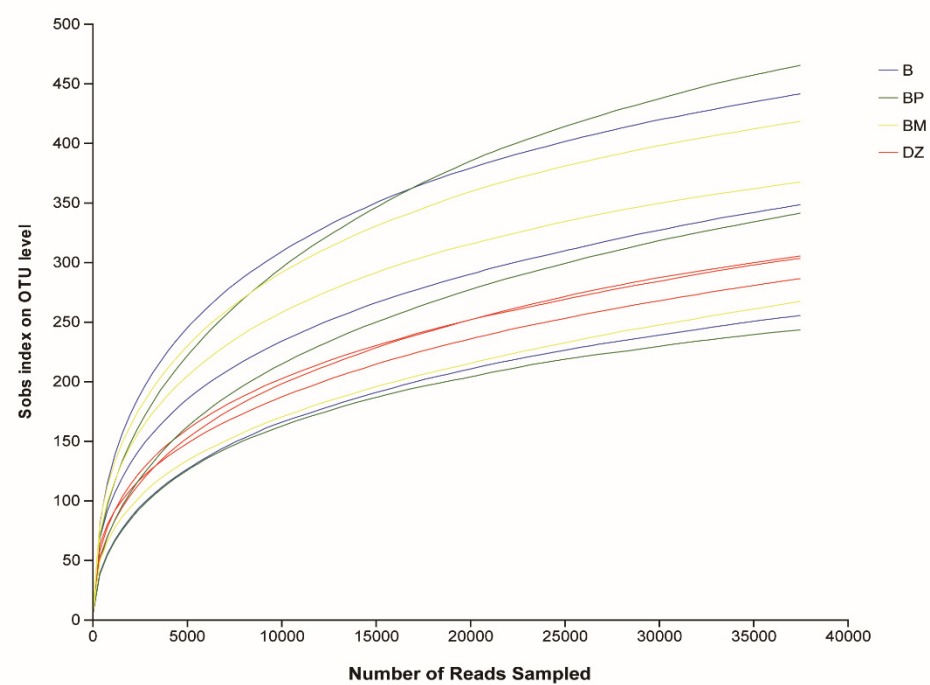

**Figure S1.** Analysis of rarefaction curves
