# Supplementary material for: Effects of Bacillus pumilus BP-171 and Carbon Sources on the Growth Performance of Shrimp, Water Quality and Bacterial Community in Penaeus vannamei Culture System
Source: MDPI journal article supplement (doi:10.3390/w14244037), 2022-12-10
Supplement: s1 [file s1]

Archive with 1 entries (1 files):
- Supplementary.pdf
